# Supplementary material for: Dual-role magnesium aluminate ceramic film as an advanced separator and polysulfide trapper in a Li–S battery: experimental and DFT investigations
Source: Royal Society of Chemistry journal article supplement (doi:10.1039/d1nj05347g), 2022-01-01
Supplement: d1nj05347g1.pdf [file d1nj05347g1.pdf]

**Dual-role Magnesium Aluminate Ceramic Film as an Advanced Separator and  
Polysulfide Trapper in Li-S battery: Experimental and DFT investigations**

Divyamahalakshmi Muthuraj <sup>a</sup>, Raja Murugan <sup>a</sup>, Pavul Raj Rayappan <sup>a</sup>, Ganapathi Rao  
Kandregula <sup>a</sup>, Kothandaraman Ramanujam <sup>a,b,\*</sup>

<sup>a</sup> Clean Energy Lab, Department of Chemistry, Indian Institute of Technology Madras,  
Chennai-600036, India

<sup>b</sup> Potential Centre of Excellence: Advanced Centre for Energy Storage and Conversion,  
Indian Institute of Technology Madras, Chennai-600036, India

\* Corresponding author E-mail address: [rkraman@iitm.ac.in](mailto:rkraman@iitm.ac.in)

**Table S1.** Porosity calculation for Celgard<sup>®</sup>, MAO, and MAO/MWCNT separator

| Separator            | Mass of dry separator (mg) | Mass of DME/DOL absorbed separator (mg) | Mass of DME/DOL absorbed (mg) | Porosity (%) estimated using eq. 1 |
|----------------------|----------------------------|-----------------------------------------|-------------------------------|------------------------------------|
| Celgard <sup>®</sup> | 4.2                        | 7.1                                     | 2.9                           | 38.5                               |
| MAO                  | 46.3                       | 66.8                                    | 20.5                          | 62.6                               |
| MAO/MWCNT            | 48.8                       | 76.4                                    | 27.5                          | 68.1                               |

When the thickness of the MAO separator is less than 100 microns, the mechanical strength of the separator is poor and tend to break (brittle). Therefore, we have limited the thickness of the separator to be 100  $\mu\text{m}$  and it is highly flexible. Further studies are required to fabricate a thin MAO separator for realistic future application in battery, and we will work towards it in future.

**Table S2.** Electrical parameters of Li|Celgard®|Li symmetric cell over time (derived from Nyquist plot Fig. 2d).

**R<sub>el</sub>** - electrolyte resistance,

**R<sub>pass</sub>** - passivation layer resistance

**R<sub>i</sub>** - interfacial charge transfer resistance

**Y<sub>pass</sub>, Y<sub>i</sub>** - admittance

**n<sub>pass</sub>, n<sub>i</sub>** - CPE index

| <b>Time (h)</b> | <b><math>\chi^2</math></b>       | <b>R<sub>el</sub>(<math>\Omega</math>)/<br/>% Error</b> | <b>R<sub>pass</sub>(<math>\Omega</math>)/<br/>% Error</b> | <b>Y<sub>pass</sub><br/>(mho<math>\times</math>S<sup>n</sup>)/<br/>% Error</b> | <b>n<sub>pass</sub>/<br/>% Error</b> | <b>R<sub>i</sub> (<math>\Omega</math>)/<br/>% Error</b> | <b>Y<sub>i</sub><br/>(mho<math>\times</math>S<sup>n</sup>)/<br/>% Error</b> | <b>n<sub>i</sub>/<br/>% Error</b> |
|-----------------|----------------------------------|---------------------------------------------------------|-----------------------------------------------------------|--------------------------------------------------------------------------------|--------------------------------------|---------------------------------------------------------|-----------------------------------------------------------------------------|-----------------------------------|
| 0               | 7.5 $\times$<br>10 <sup>-5</sup> | 3.4/0.8                                                 | 17.3/15.6                                                 | 1.9 $\times$ 10 <sup>-1</sup> /<br>12.2                                        | 0.67/<br>11.4                        | 140.3/0.2                                               | 4.9 $\times$ 10 <sup>-6</sup> /<br>1.4                                      | 0.82/<br>0.1                      |
| 24              | 1.0 $\times$<br>10 <sup>-3</sup> | 4.1/1.3                                                 | 31.9/16.6                                                 | 7.8 $\times$ 10 <sup>-2</sup> /<br>44                                          | 0.59/<br>49                          | 281.1/0.9                                               | 3.7 $\times$ 10 <sup>-6</sup> /<br>4.1                                      | 0.83/<br>0.4                      |
| 48              | 4.2 $\times$<br>10 <sup>-3</sup> | 4.4/2.4                                                 | 33.1/11.1                                                 | 5.5 $\times$ 10 <sup>-2</sup> /<br>18.7                                        | 0.56/<br>10.1                        | 319.5/3                                                 | 2.9 $\times$ 10 <sup>-6</sup> /<br>15.3                                     | 0.88/<br>2.1                      |
| 72              | 1.3 $\times$<br>10 <sup>-3</sup> | 3.3/9.3                                                 | 81.2/33.2                                                 | 1.7 $\times$ 10 <sup>-2</sup> /<br>47.2                                        | 0.33/<br>20.7                        | 342.2/3.5                                               | 5.9 $\times$ 10 <sup>-6</sup> /<br>13.3                                     | 0.77/<br>2.4                      |
| 144             | 6.2 $\times$<br>10 <sup>-3</sup> | 3.9/3.3                                                 | 55.1/17                                                   | 2.1 $\times$ 10 <sup>-4</sup> /<br>11.7                                        | 0.15/<br>19.1                        | 360.6/17.<br>2                                          | 2.6 $\times$ 10 <sup>-6</sup> /<br>29.1                                     | 0.85/<br>3.7                      |
| 216             | 3.1 $\times$<br>10 <sup>-3</sup> | 3.7/3                                                   | 56.4/8.1                                                  | 7.9 $\times$ 10 <sup>-4</sup> /<br>12.1                                        | 0.64/<br>10.2                        | 470/2.8                                                 | 1.7 $\times$ 10 <sup>-6</sup> /<br>7.2                                      | 0.84/<br>0.8                      |
| 408             | 7.5 $\times$<br>10 <sup>-3</sup> | 2.7/7.6                                                 | 52.2/13.1                                                 | 9.5 $\times$ 10 <sup>-4</sup> /<br>18.3                                        | 0.61/<br>16.3                        | 469.2/4.7                                               | 2.0 $\times$ 10 <sup>-1</sup> /<br>16.1                                     | 0.83/<br>2.0                      |

**Table S3.** Electrical parameters of Li|MAO/MWCNT|Li symmetric cell over time (derived from Nyquist plot Fig. 2e)

| <b>Time (h)</b> | $\chi^2$            | $R_{el}(\Omega)$ /<br>% Error | $R_{pass}(\Omega)$ /<br>% Error | $Y_{pass}(\text{mho}\times\text{S}^n)$ /<br>% Error | $n_{pass}$ /<br>% Error | $R_i(\Omega)$ /<br>% Error | $Y_i(\text{mho}\times\text{S}^n)$ /<br>% Error | $n_i$ /<br>% Error |
|-----------------|---------------------|-------------------------------|---------------------------------|-----------------------------------------------------|-------------------------|----------------------------|------------------------------------------------|--------------------|
| 0               | $4.3\times 10^{-4}$ | 8.5/1.3                       | 39.6/15.7                       | $3.2\times 10^{-2}$ /<br>14.8                       | 0.53/<br>15.8           | 121.2/6.5                  | $6.9\times 10^{-5}$ /<br>13.2                  | 0.59/<br>1.9       |
| 24              | $5.7\times 10^{-4}$ | 10.2/1.8                      | 53.4/70                         | $3.9\times 10^{-2}$ /<br>42                         | 0.36/<br>56.1           | 136.5/12.<br>6             | $1.3\times 10^{-4}$ /<br>21.2                  | 0.53/<br>4.2       |
| 48              | $9.8\times 10^{-4}$ | 4.9/2.1                       | 19.5/14                         | $2.6\times 10^{-3}$ /<br>12.1                       | 0.32/<br>56.5           | 111.4/14.<br>0             | $9.6\times 10^{-6}$ /<br>21                    | 0.78/<br>2.29      |
| 72              | $2.9\times 10^{-3}$ | 3.8/6.0                       | 16.1/9.4                        | $4.5\times 10^{-2}$ /<br>49.7                       | 0.39/<br>46.3           | 90.8/21.7<br>2             | $2.5\times 10^{-4}$ /<br>34.5                  | 0.5/<br>6.5        |
| 144             | $1.8\times 10^{-3}$ | 4.1/8.9                       | 8.3/56.1                        | $6.3\times 10^{-3}$ /<br>3.6                        | 0.46/<br>1.1            | 82.4/5.6                   | $9.2\times 10^{-6}$ /<br>8.5                   | 0.81/<br>5.3       |
| 216             | $1.0\times 10^{-3}$ | 4.4/2.1                       | 10.5/10.9                       | $1.2\times 10^{-5}$ /<br>17.9                       | 0.78/<br>2.1            | 89.2/9.8                   | $2.6\times 10^{-7}$ /<br>53.1                  | 0.11/<br>5.7       |
| 408             | $9.8\times 10^{-4}$ | 4.1/2.5                       | 16.2/15.4                       | $1.2\times 10^{-5}$ /27.7                           | 0.76/<br>3.2            | 68.4/7.6                   | $6.3\times 10^{-7}$ /<br>51.2                  | 0.94/<br>4         |

**Table S4.** CV results of S electrode at various scan rate using MAO/MWCNT separator and Li-ion diffusivity values

| Scan rate/<br>(mV s <sup>-1</sup> )                                   | V <sub>o</sub> (I')<br>/ V      | I <sub>o</sub> (I')/<br>mA | V <sub>o</sub> (II')<br>/ V      | I <sub>o</sub> (II')/<br>mA | V <sub>r</sub> (I)/<br>V        | I <sub>r</sub> (I)/<br>mA | V <sub>r</sub> (II)<br>)/ V     | I <sub>r</sub> (II)/<br>mA | Voltage<br>difference<br>V(I-I') | Voltage<br>difference<br>V(II-II') |
|-----------------------------------------------------------------------|---------------------------------|----------------------------|----------------------------------|-----------------------------|---------------------------------|---------------------------|---------------------------------|----------------------------|----------------------------------|------------------------------------|
| 0.01                                                                  | 2.4                             | 0.28                       | 2.35                             | 0.59                        | 2.35                            | 0.23                      | 2.05                            | 0.62                       | 0.05                             | 0.29                               |
| 0.02                                                                  | 2.41                            | 0.39                       | 2.33                             | 0.83                        | 2.34                            | 0.33                      | 2.04                            | 0.82                       | 0.07                             | 0.28                               |
| 0.04                                                                  | 2.42                            | 0.59                       | 2.35                             | 1.1                         | 2.33                            | 0.48                      | 2.01                            | 1.04                       | 0.09                             | 0.33                               |
| 0.08                                                                  | 2.43                            | 1.02                       | 2.37                             | 1.63                        | 2.32                            | 0.75                      | 2.0                             | 1.42                       | 0.12                             | 0.37                               |
| 0.1                                                                   | 2.44                            | 1.23                       | 2.38                             | 1.85                        | 2.31                            | 0.83                      | 1.99                            | 1.59                       | 0.13                             | 0.38                               |
| 0.2                                                                   | 2.49                            | 1.94                       | 2.43                             | 2.64                        | 2.28                            | 1.21                      | 1.96                            | 2.1                        | 0.21                             | 0.47                               |
| <b>Diffusion<br/>coefficient<br/>t/ cm<sup>2</sup> s<sup>-1</sup></b> | <b>3.7×<br/>10<sup>-7</sup></b> |                            | <b>2.04×<br/>10<sup>-8</sup></b> |                             | <b>1.3×<br/>10<sup>-7</sup></b> |                           | <b>1.1×<br/>10<sup>-8</sup></b> |                            |                                  |                                    |

**Table S5.** CV results of S electrode at various scan rates using Celgard® separator and Li-ion diffusivity values

| Scan rate/ mV s <sup>-1</sup>                               | V <sub>o</sub> (I')/ V   | I <sub>o</sub> (I')/ mA | V <sub>o</sub> (II')/ V    | I <sub>o</sub> (II')/ mA | V <sub>r</sub> (I)/ V      | I <sub>r</sub> (I)/ mA | V <sub>r</sub> (II)/ V     | I <sub>r</sub> (II)/ mA | Voltage difference V(I-I') | Voltage difference V(II-II') |
|-------------------------------------------------------------|--------------------------|-------------------------|----------------------------|--------------------------|----------------------------|------------------------|----------------------------|-------------------------|----------------------------|------------------------------|
| 0.01                                                        | 2.39                     | 0.27                    | 2.29                       | 0.44                     | 2.32                       | 0.15                   | 2.06                       | 0.64                    | 0.07                       | 0.23                         |
| 0.02                                                        | 2.42                     | 0.41                    | 2.34                       | 0.63                     | 2.31                       | 0.32                   | 2.03                       | 0.72                    | 0.11                       | 0.31                         |
| 0.04                                                        | 2.47                     | 0.74                    | 2.39                       | 0.90                     | 2.28                       | 0.46                   | 1.98                       | 0.82                    | 0.19                       | 0.42                         |
| 0.08                                                        | 2.53                     | 1.19                    | 2.47                       | 1.24                     | 2.25                       | 0.66                   | 1.92                       | 1.06                    | 0.28                       | 0.55                         |
| 0.1                                                         | 2.56                     | 1.32                    | 2.51                       | 1.33                     | 2.23                       | 0.70                   | 1.89                       | 1.11                    | 0.33                       | 0.62                         |
| <b>Diffusion coefficient/ cm<sup>2</sup> s<sup>-1</sup></b> | <b>4×10<sup>-7</sup></b> |                         | <b>9.9×10<sup>-9</sup></b> |                          | <b>9.8×10<sup>-8</sup></b> |                        | <b>2.9×10<sup>-9</sup></b> |                         |                            |                              |

\*V<sub>o</sub>,V<sub>r</sub> – oxidation and reduction potential

I<sub>o</sub>, I<sub>r</sub> – Peak current for oxidation and reduction process

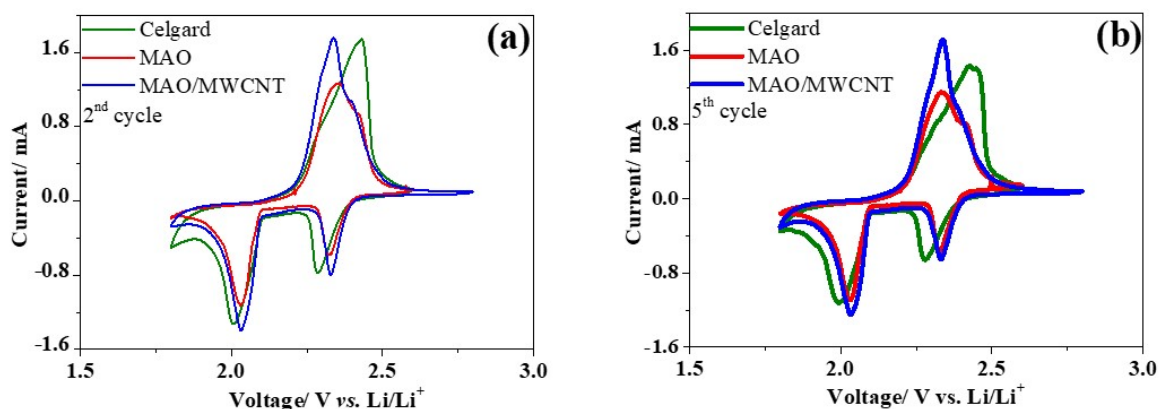

**Fig. S1:** CV of Li-S cell using Celgard®, MAO and MAO/MWCNT separator at  $0.05 \text{ mV s}^{-1}$  scan rate for 2<sup>nd</sup> cycle and 5<sup>th</sup> cycle

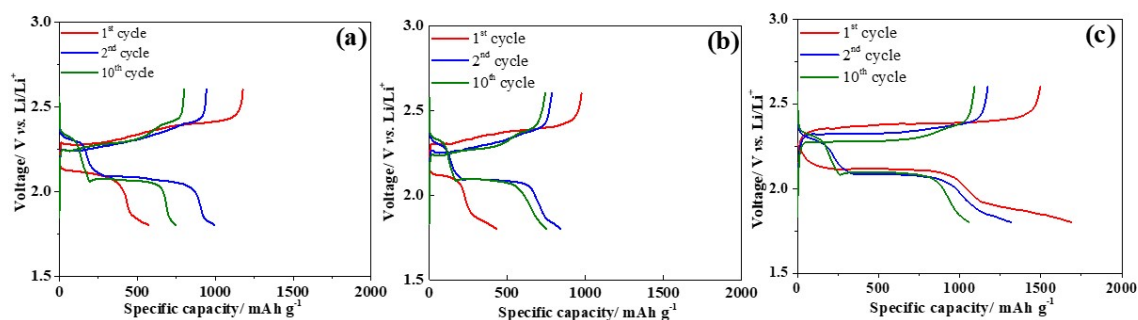

**Fig. S2:** Galvanostatic charge-discharge profile of Li-S cell for 1<sup>st</sup>, 2<sup>nd</sup>, and 10<sup>th</sup> cycle at 0.2 C rate while using (a) Celgard®, (b) MAO, and (c) MAO/MWCNT separators

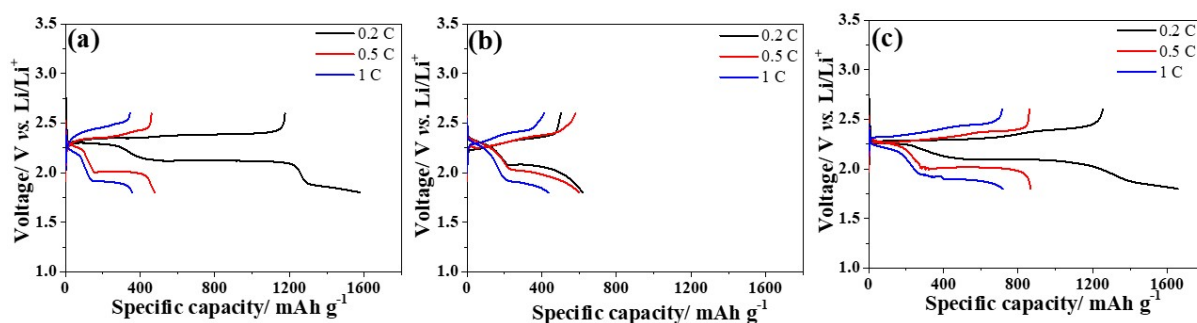

**Fig. S3:** Galvanostatic charge-discharge profile of Li-S cell at 0.2 C, 0.5 C, 1 C rate while using (a) Celgard®, (b) MAO, and (c) MAO/MWCNT separators
